# Supplementary material
Source: Springer Nature journal article supplement (https://www.springermedizin.de/resource/supplementary/12936_2008_623_MOESM4_ESM.pdf/9547846)

**4a)****PF**

Overall 7.4%

**PV**

Overall 6.4%

**Mix**

Overall 1.9%

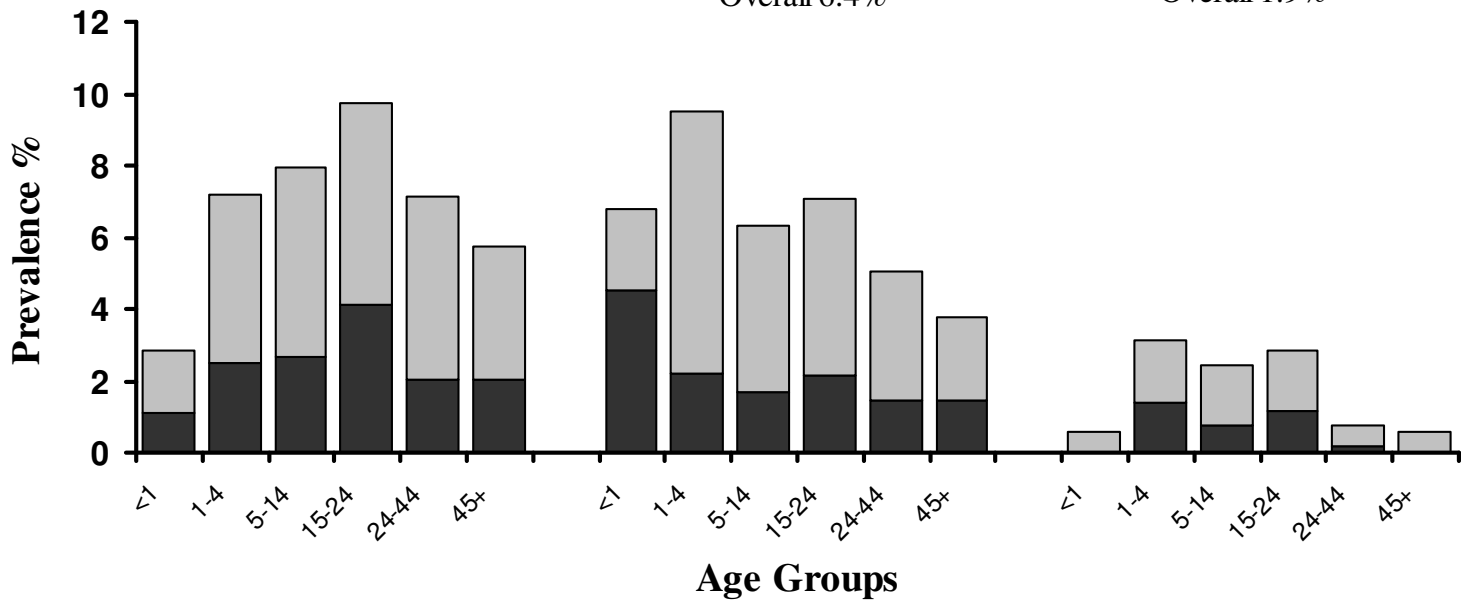**4b)****PF**

Overall 46%

**PV**

Overall 39%

**Mix**

Overall 11%

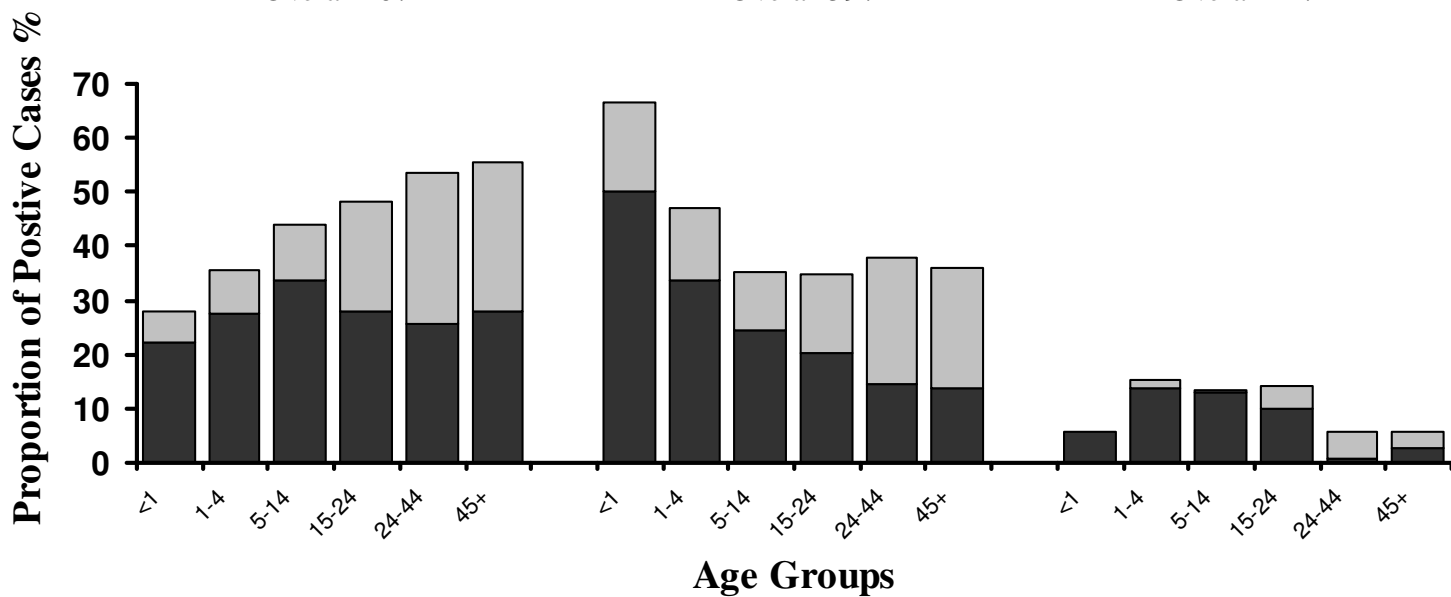

Supplement: MOESM4 [file 9547846]
